# Supplementary material for: Mind the gap! tailoring sol–gel ceramic mesoporous coatings on labile metal–organic frameworks through kinetic control
Source: Royal Society of Chemistry journal article supplement (doi:10.1039/d1qi01128f), 2021-11-16
Supplement: d1qi01128f1.pdf [file d1qi01128f1.pdf]

## **Mind the Gap! Tailoring Sol-gel Ceramic Mesoporous Coatings on Labile Metal-organic Frameworks through Kinetic Control.**

Elisa Bindini<sup>a</sup>, Tanja Lüdtke<sup>a</sup>, Dorleta Otaegui<sup>b</sup>, Marco Möller<sup>c</sup>, Ryma Haddad<sup>d</sup>, Cédric Boissière<sup>d</sup>, Sergio Moya<sup>a\*</sup>

<sup>a</sup>Soft Matter Nanotechnology Group,  
CIC biomaGUNE, Basque Research and Technology Alliance (BRTA), Paseo Miramón 182,  
20014 San Sebastián, Guipúzcoa, Spain

<sup>b</sup>Mass spectrometry platform, CIC biomaGUNE, Basque Research and Technology Alliance  
(BRTA), Paseo Miramón 182, 20014 San Sebastián, Guipúzcoa, Spain

<sup>c</sup>Electron microscopy platform,  
CIC biomaGUNE, Basque Research and Technology Alliance (BRTA), Paseo Miramón 182,  
20014 San Sebastián, Guipúzcoa, Spain

<sup>d</sup>Laboratoire de Chimie de la Matière Condensée de Paris, Sorbonne University, Place Jussieu  
4, 75005 Paris, France

\* Corresponding author E-mail: [smoya@cicbiomagune.es](mailto:smoya@cicbiomagune.es)

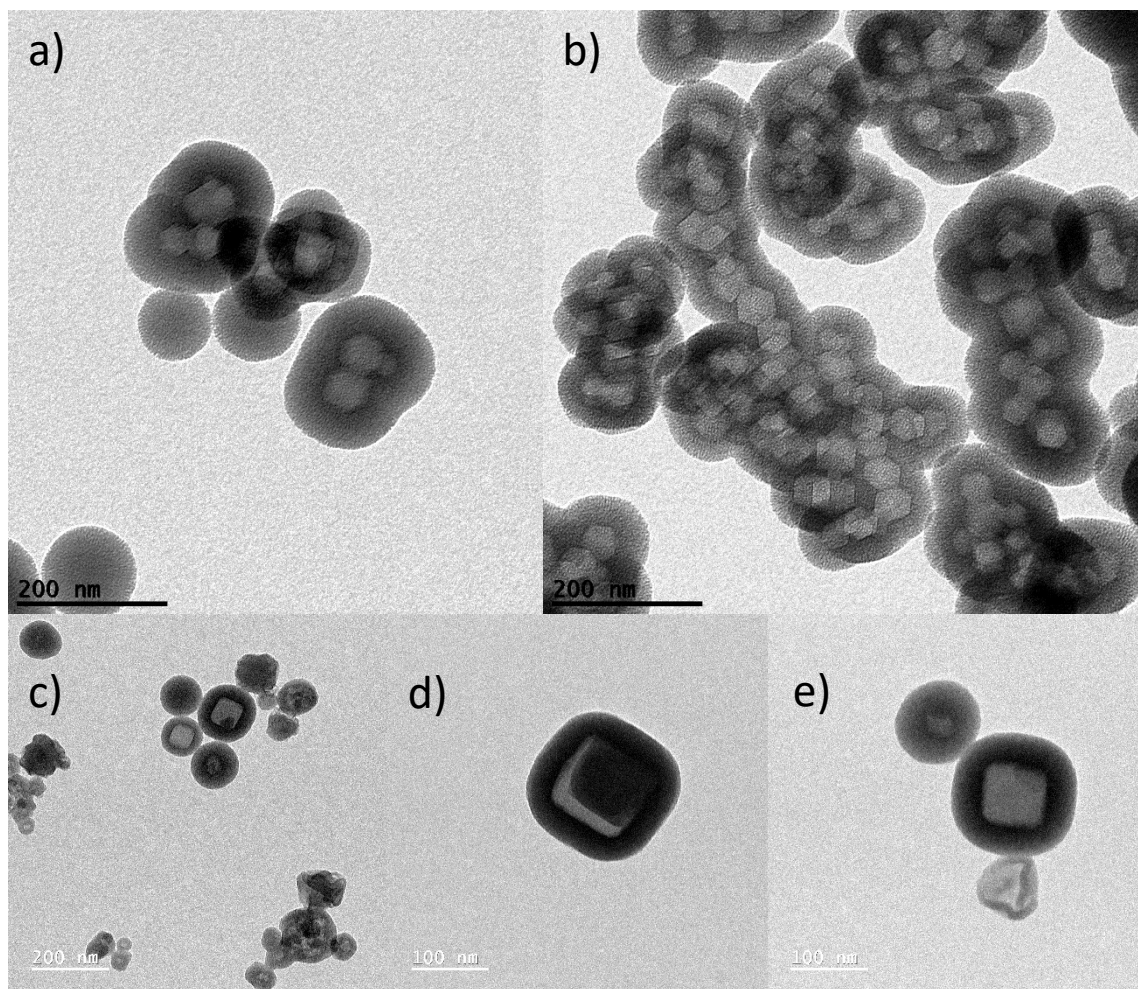

*S1: ZIF-8@SiO<sub>2</sub> NPs synthesized with a high TEOS/Zn ratio: **a-b)**  $r > 55$  **c-e)**  $r = 55$ . We can observe dissolution of the ZIF seed and aggregation proportional to TEOS amount. In **a-b)** the ZIF is completely dissolved while in **d)** we can observe a yolk-shell structure, even if the majority of NPs obtained in this condition ( $r = 55$ ) are hollow.*

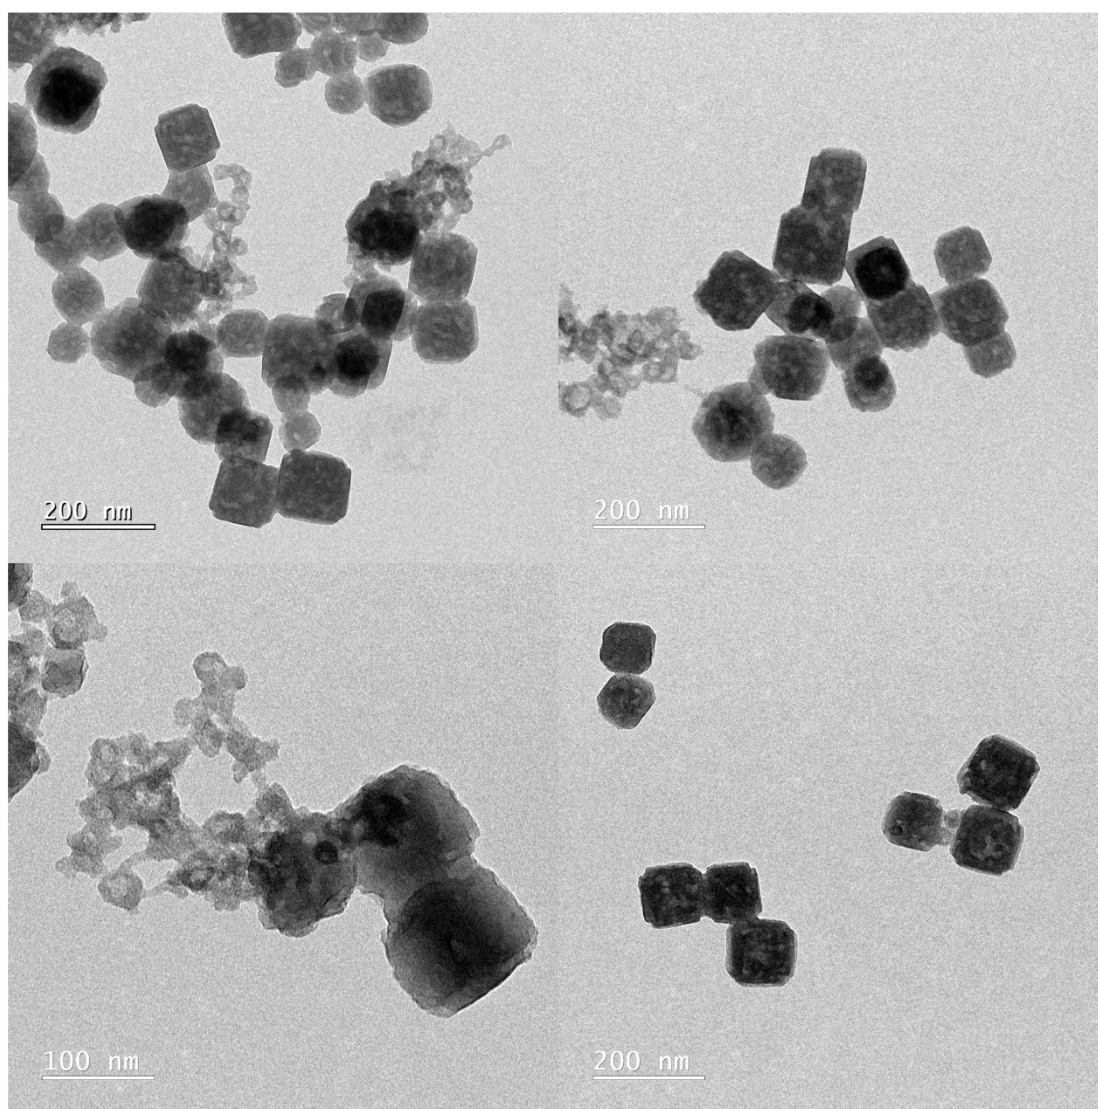

S2: TEM images of ZIF-8@SiO<sub>2</sub> NC particles, synthesized with a TEOS/Zn ratio  $r=27$  and a reaction time of 1h.

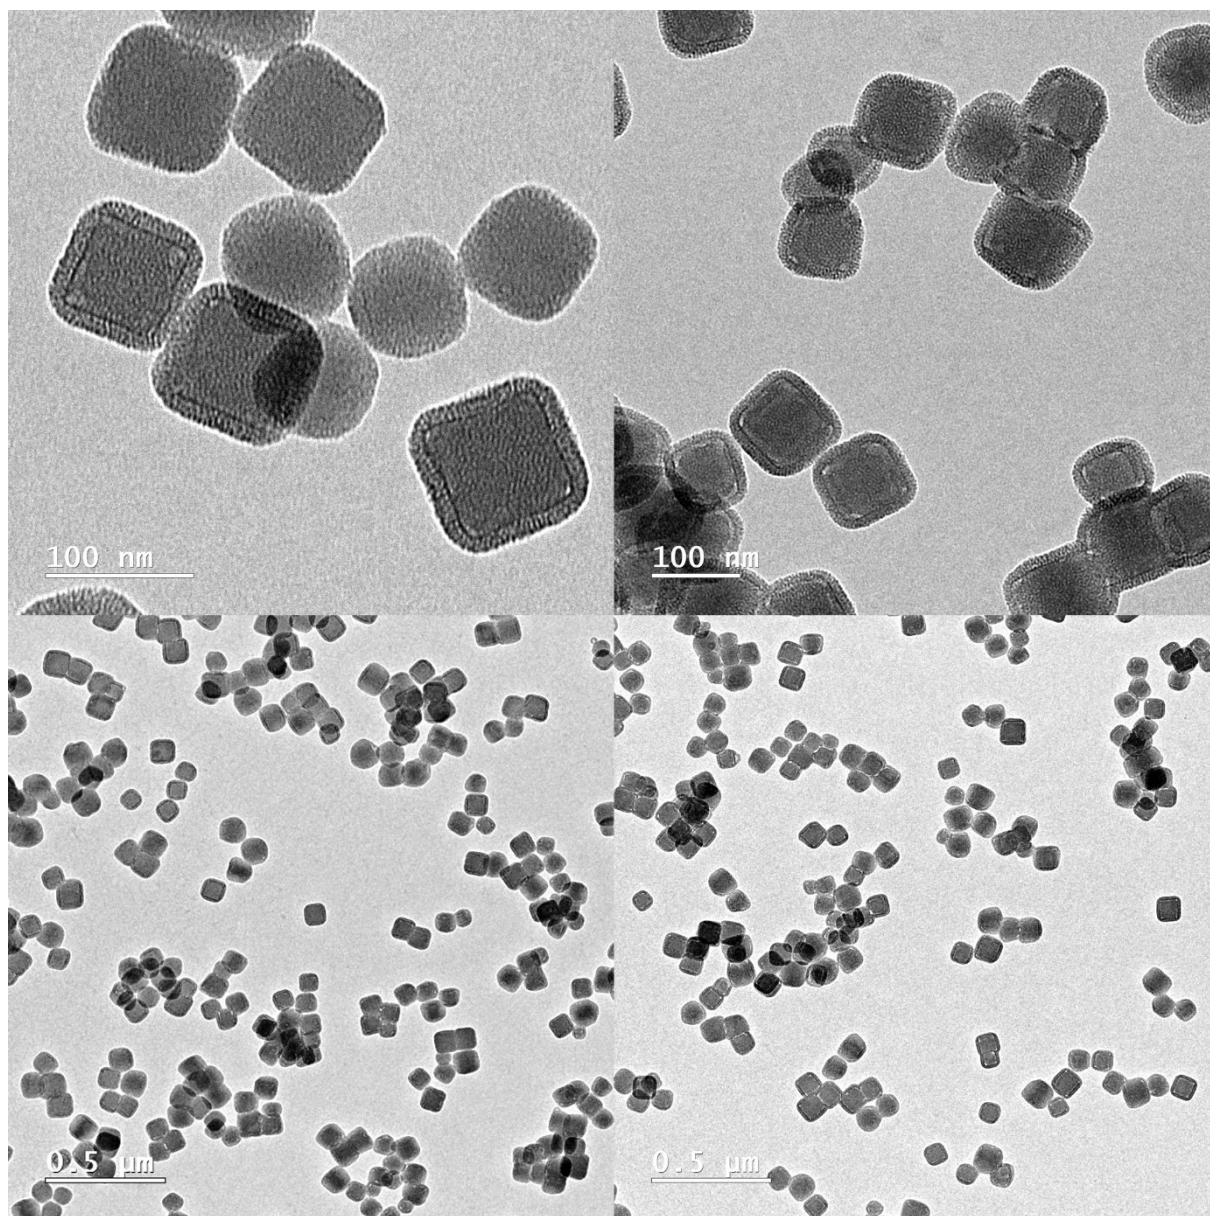

S3: TEM images of ZIF-8@SiO<sub>2</sub> NC particles, synthesized with a TEOS/Zn ratio  $r=15$  and a reaction time of 3h.

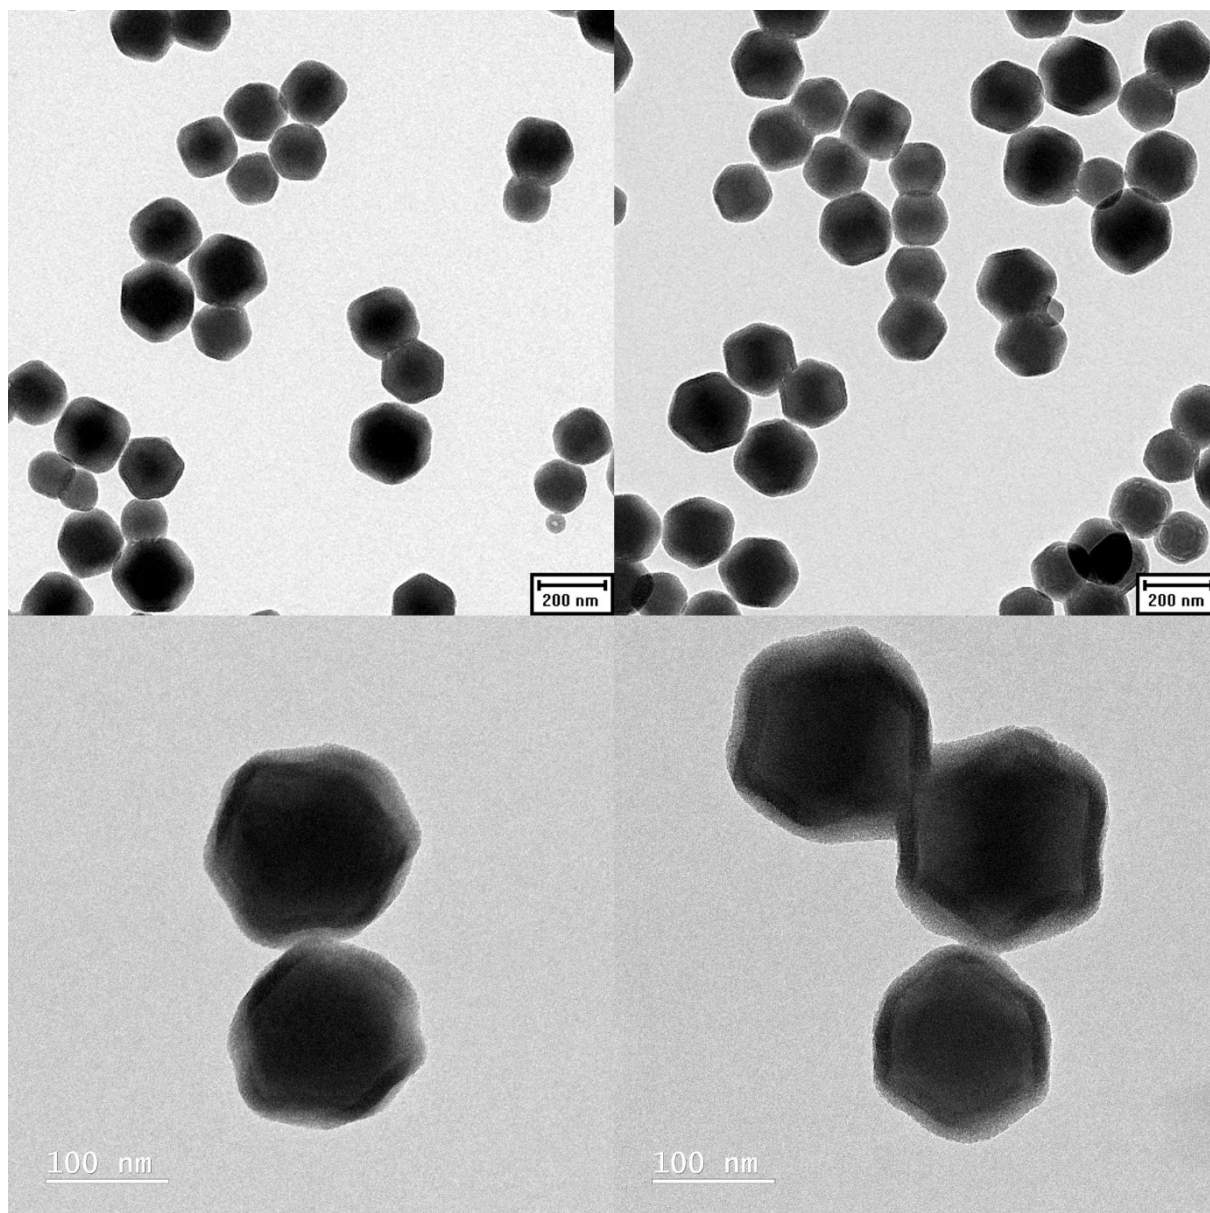

S4: TEM images of ZIF-8@SiO<sub>2</sub> RD particles, synthesized with a TEOS/Zn ratio  $r=15$  and a reaction time of 3h.

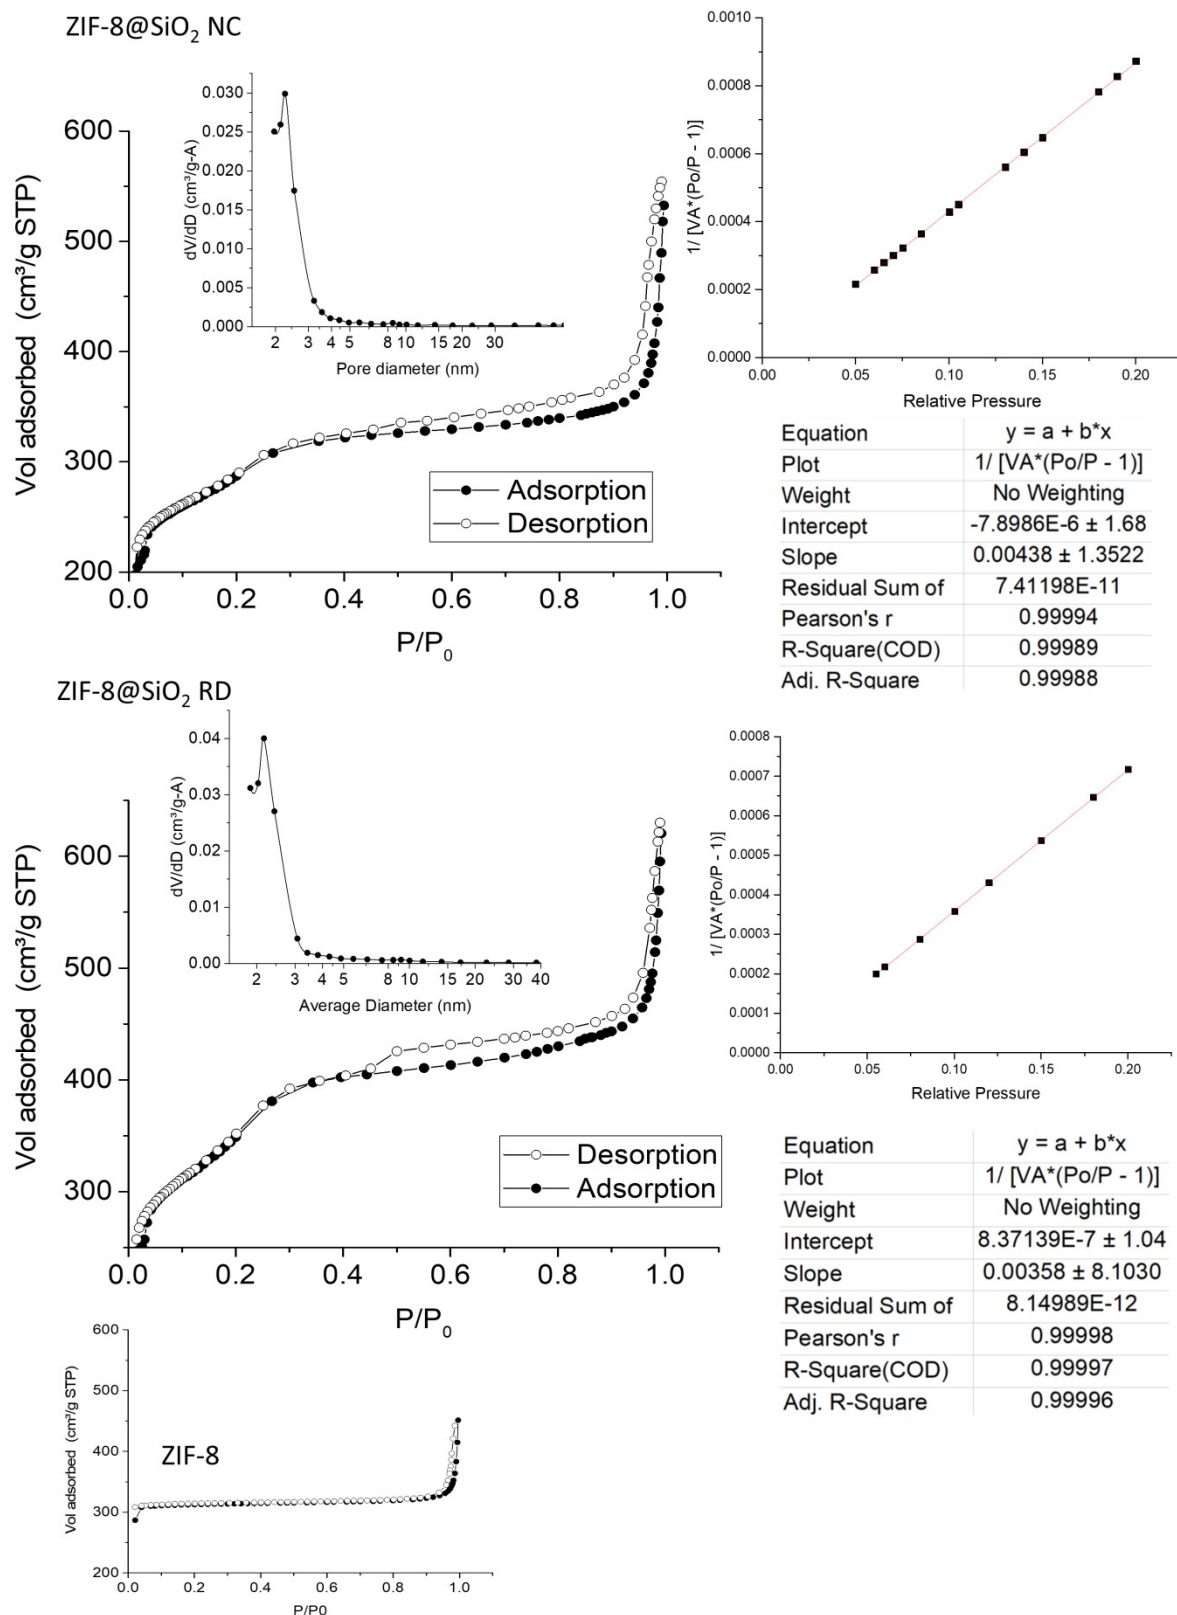

S5: Adsorption/Desorption isotherms of N<sub>2</sub> for ZIF-8@SiO<sub>2</sub> NPs and the corresponding pore size distribution, calculated from the Adsorption branch. Samples have been degassed overnight at 250°C prior to the measurement. On the left, points used to calculate BET surface area are reported. On the bottom is reported the adsorption/desorption isotherm of model ZIF-8 nanocrystals, as basis for comparison.

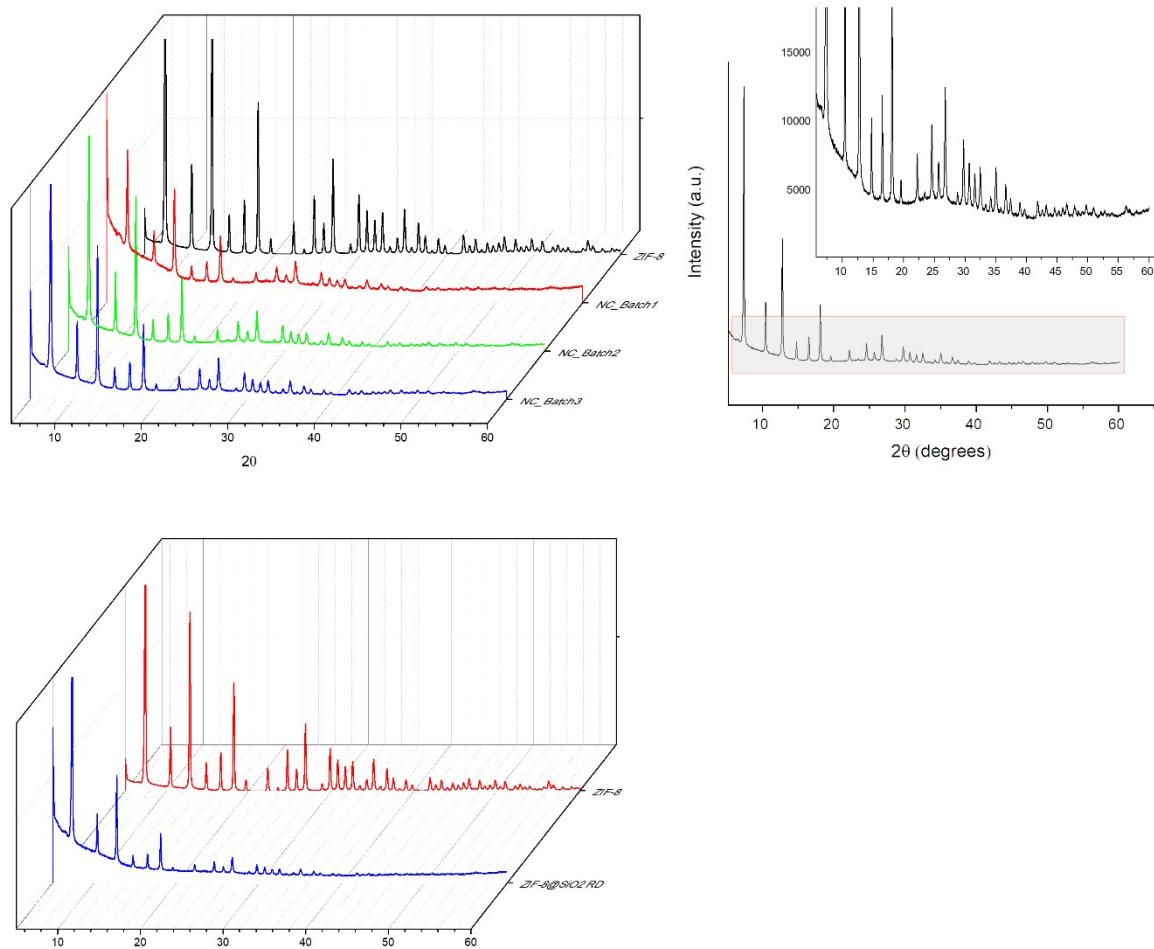

*S6: XRD analysis of ZIF-8@SiO<sub>2</sub> NC (top) and RD (bottom). The broad peak of amorphous silica is visible at 25 degrees (zoom on NC\_Batch1 sample, top right). The ZIF-8 pattern is found in every batch analyzed, confirming the presence of a ZIF-8 core in the core-shell NPs obtained.*

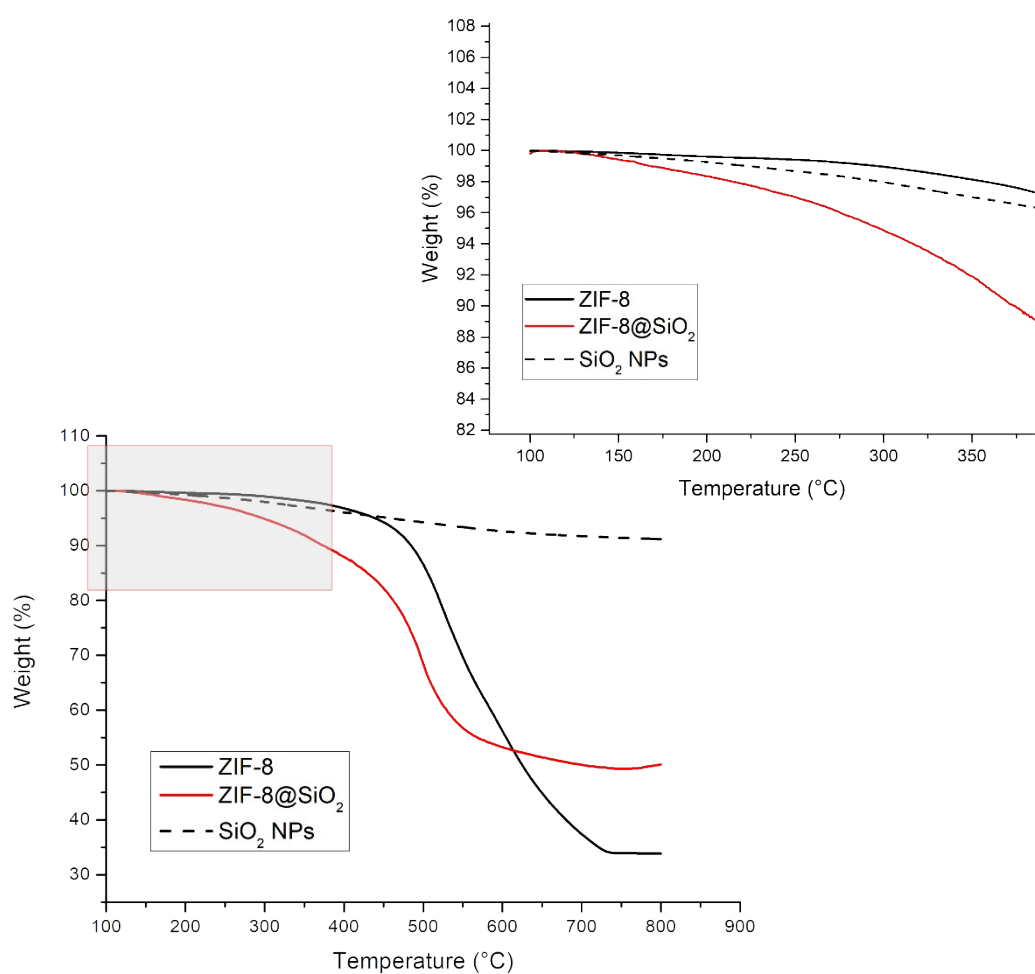

S7: TGA curves of ZIF-8 NPs (black line), ZIF-8@SiO<sub>2</sub> NP (red line) and SiO<sub>2</sub> NPs (dashed line). On the top right is reported a zoom of the graph corresponding to the grey rectangle. Analysis has been done under a N<sub>2</sub> flow with a temperature ramp of 10°C/min and a starting equilibration step of 20 min at 100°C. ZIF-8@SiO<sub>2</sub> NP lose more water than ZIF-8 or SiO<sub>2</sub> NPs in the water removal phase (<300°C), suggesting a possible contribute of a thin layer of hydrate zinc silicate between ZIF-8 and silica.

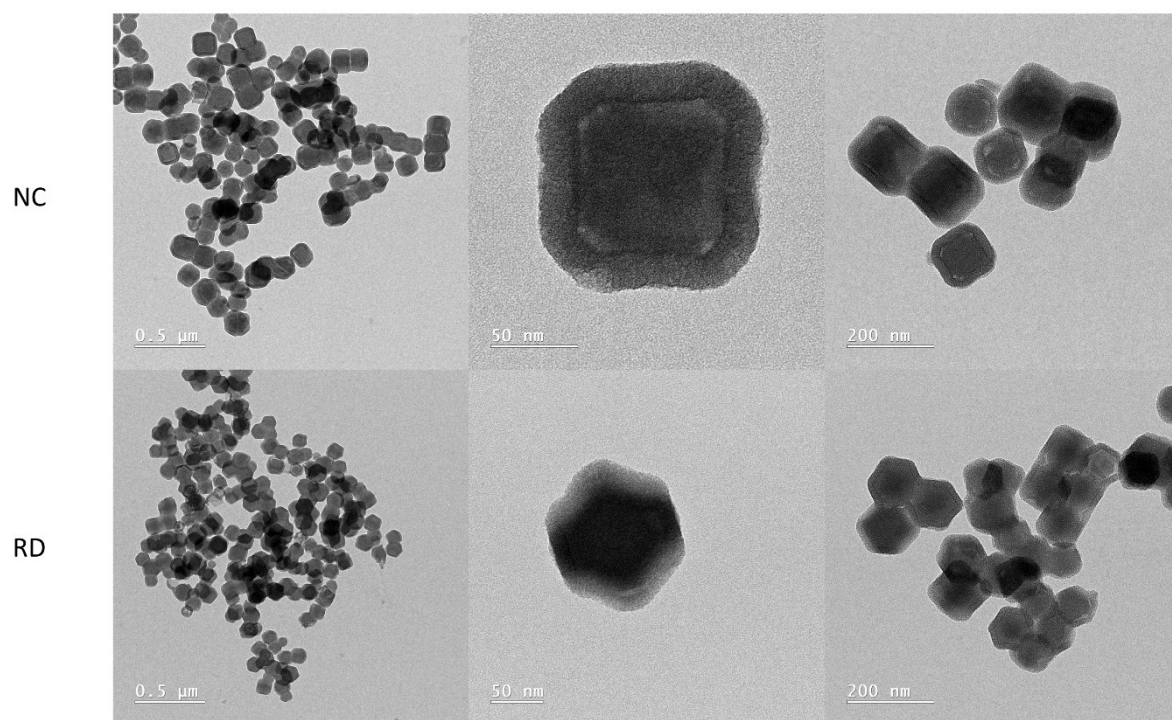

S8: TEM images of ZIF-8@SiO<sub>2</sub> NC (top) and RD (bottom) nanoparticles after calcination at 250°C for 4h in N<sub>2</sub> atmosphere.
